# Supplementary material for: Molecular and functional characterization of the voltage‐gated proton channel in zebrafish neutrophils
Source: PubMed Central journal article supplement (PMC5555884; doi:10.14814/phy2.13345), 2017-08-03

**Figure S1**

|       |                                                                                  |    |
|-------|----------------------------------------------------------------------------------|----|
| hHv1  | MAT-----WDEKAVTRR-AKVA-----                                                      | 16 |
| mHv1  | MTS-----HDPKAVTRR-TKVA-----                                                      | 16 |
| DrHv1 | M-----                                                                           | 1  |
| CiHv1 | MEGDNCNKSRRHKSHNMI-----NPNYASVRC TQPLPSVIQLRSRNMIGITEDPSSDSEPVSSNQ-----PLLLTNLS  | 68 |
| SpHv1 | MKPD-LKQTEEVVSQGLLEQGDGGSSSHGNKVGEK-SGDGQFAEQGGVCETSEDKNDGCETHSGAKTDKHKTKLEGETAP | 78 |
| NpHv1 | MWL-----                                                                         | 3  |
| LpHv1 | MAG-----                                                                         | 3  |
| kHv1  | M-----                                                                           | 1  |

|       |                                                                             |     |
|-------|-----------------------------------------------------------------------------|-----|
| hHv1  | --PAERMSKFLRHFTVVGDDYHAWNINYKKWENEEEEEEEEQPPPTPVSGEEGRAA-APDVAPAPGPAPRAPLD  | 93  |
| mHv1  | --PTKRMSRFLKHFTVVGDDYHTWNVNYKKWENEEEEEEE--PAP TSAEG-EGNAE-GPDAEAGSASTPRQSLD | 89  |
| DrHv1 | -----SRYLKHFTAVGDNKNA-----VPTWHEEDTSHH-----V TTLHD-APDGLVSTGQHLGQLS         | 58  |
| CiHv1 | YEVHTFNDNNNHERPAPQEQTQ--NTMISMQSEQKSDR--FTASNLGMFQYMKFEIGEDGDDHEEE---AILT   | 141 |
| SpHv1 | ADAEMFGFRRLSDTTKPSEGNDQ---QRVIVKDDSSDS-----VVSD-SHDGHPARTE---PLS            | 136 |
| NpHv1 | ---KMDAHKRLSE-----DLEKVMKEDGNSS-----IMTEPDHNIQPSK-----TVRERLR               | 47  |
| LpHv1 | -----HH-----GAPS-KHEEHAATAPH-----GIKHGL-                                    | 26  |
| kHv1  | -----DRILHH-----AVHT-VHTSKSARDAE--GHGT                                      | 32  |

|       |                                  |     |
|-------|----------------------------------|-----|
| hHv1  | KLFSSHRFQVVIICLVVLDALLVLAELILD   | 128 |
| mHv1  | KLFSSHRFQVVIICLVVLDALLVLAELLLD   | 124 |
| DrHv1 | KLYSTERFQIVVVCLVVLDAIFVLCCELLI   | 93  |
| CiHv1 | HILHSKPIHVAIIVLVVLD SFLVVGELLI   | 176 |
| SpHv1 | EIMETQKFHIAILVVLVIDCIVVIVELVI    | 183 |
| NpHv1 | KLLHSHKFFQISVITLVIIDCLLVITELLI   | 80  |
| LpHv1 | QLYNSKACLVLVFFLLILDVCIVVASGVLE   | 106 |
| kHv1  | EALNSSSKVHTILNVLLICDLMTVIIIGMLLE | 90  |

|       |                                                                                   |     |
|-------|-----------------------------------------------------------------------------------|-----|
| hHv1  | -----PDKNNYAAMVFHYMSITILVFFMMEIIFKLFVFRLEF                                        | 165 |
| mHv1  | -----PDEQDYAVTAFHYMSFAILVFFMLEIFFKIFVFRLEF                                        | 161 |
| DrHv1 | -----ADHHRIAPQVFHYLSLALLTFFMVELAGKIFAYRLEF                                        | 130 |
| CiHv1 | -----VPHGNPAPEILHGFSLSILSIFMVEIALKIIADHRHF                                        | 213 |
| SpHv1 | -----KEEKEVTAANVLHYISIGILSIFMIELLIKIPVFRMEF                                       | 221 |
| NpHv1 | -----HEESLAQHVLYHCSITILSIFIVEIFLKLYAFRQEF                                         | 117 |
| LpHv1 | DGLDAADAEASSGGGLFLAGHDAGRQLSSSDGDQIDCHHPHFGNHS LHDAEKILAYISIGILVIFIIEQLLLIAAMRGAY | 186 |
| kHv1  | -----SHLAHYGNHDLHEWAERMEYASLAILLIFLLENMLLVLANGCRF                                 | 134 |

|       |                                      |     |
|-------|--------------------------------------|-----|
| hHv1  | FHHKFEILDVVVVVVSFILDIV--LLFQEHQFEAL  | 241 |
| mHv1  | FHHKFEILDVAVVVVVSFVLDLV--LLFKSHHFEAL | 237 |
| DrHv1 | LHHKFEVFDGIVVVVVSFILDII--YISKEDAFDAM | 206 |
| CiHv1 | IHHKVEVLDAVVVVVISFGVDIALIFVGESEALAAI | 291 |
| SpHv1 | FRSKLEVFDGIIIIVISFVLDV--SLIYEEQFAVL  | 297 |
| NpHv1 | FKHRLEVFDALIVIVSFALDIA--FRNSRDALSGV  | 193 |
| LpHv1 | FREKLMVLDGFVITLSLLEILV----TNLPLG     | 253 |
| kHv1  | FANPFHILDIVVVVVSVGFELQ--GILGEGHDAGI  | 212 |

|       |                                                                                  |     |
|-------|----------------------------------------------------------------------------------|-----|
| hHv1  | IQH-LEFSCSEKEQEIERLNKLLRQHGLL-----                                               | 269 |
| mHv1  | IQH-LEFSCSEKEQEIERLNKLLKQNGLL-----                                               | 265 |
| DrHv1 | VNE-LKEQNTKMDQENVRLRALLKDHSIDF-----                                              | 235 |
| CiHv1 | IHN-LEEKLSQKEQDMSRLHEILRCNNIDIPPTVPLTTSVQIHSTTTASADV-----                        | 342 |
| SpHv1 | MEK-FRRYCAAQEKEIEVLRNTLNQHG IQIDDDYVAKKPQFSLNQLNVVEMNSADKH-DTGEDEGE GEEGGDGNTRRH | 375 |
| NpHv1 | LSR-CRQVCAAQQRELDVLRVLAHQHG LD-----QQLPDGNRVDVVADVEKR-----                       | 239 |
| LpHv1 | LSEQVWAHMSGEKWEAMLLRNGTEKLEMDVAKEEQRIAAQIAQAHPSVVLRALAAERQRQAAREQLQAQESKASG----- | 328 |
| kHv1  | LQK-----GSFEQHAAG-----TSGVHHARSQASSNREGRE-----G-----                             | 244 |

|       |                                     |     |
|-------|-------------------------------------|-----|
| hHv1  | -----GEVN                           | 273 |
| mHv1  | -----GDVN                           | 269 |
| DrHv1 | -----                               | 235 |
| CiHv1 | -----                               | 342 |
| SpHv1 | EKEREALGEHTITLTTDDNVNTIQADYHPQDTTFT | 410 |
| NpHv1 | -----                               | 239 |
| LpHv1 | -----RPAV                           | 332 |
| kHv1  | -----CCVQ                           | 248 |

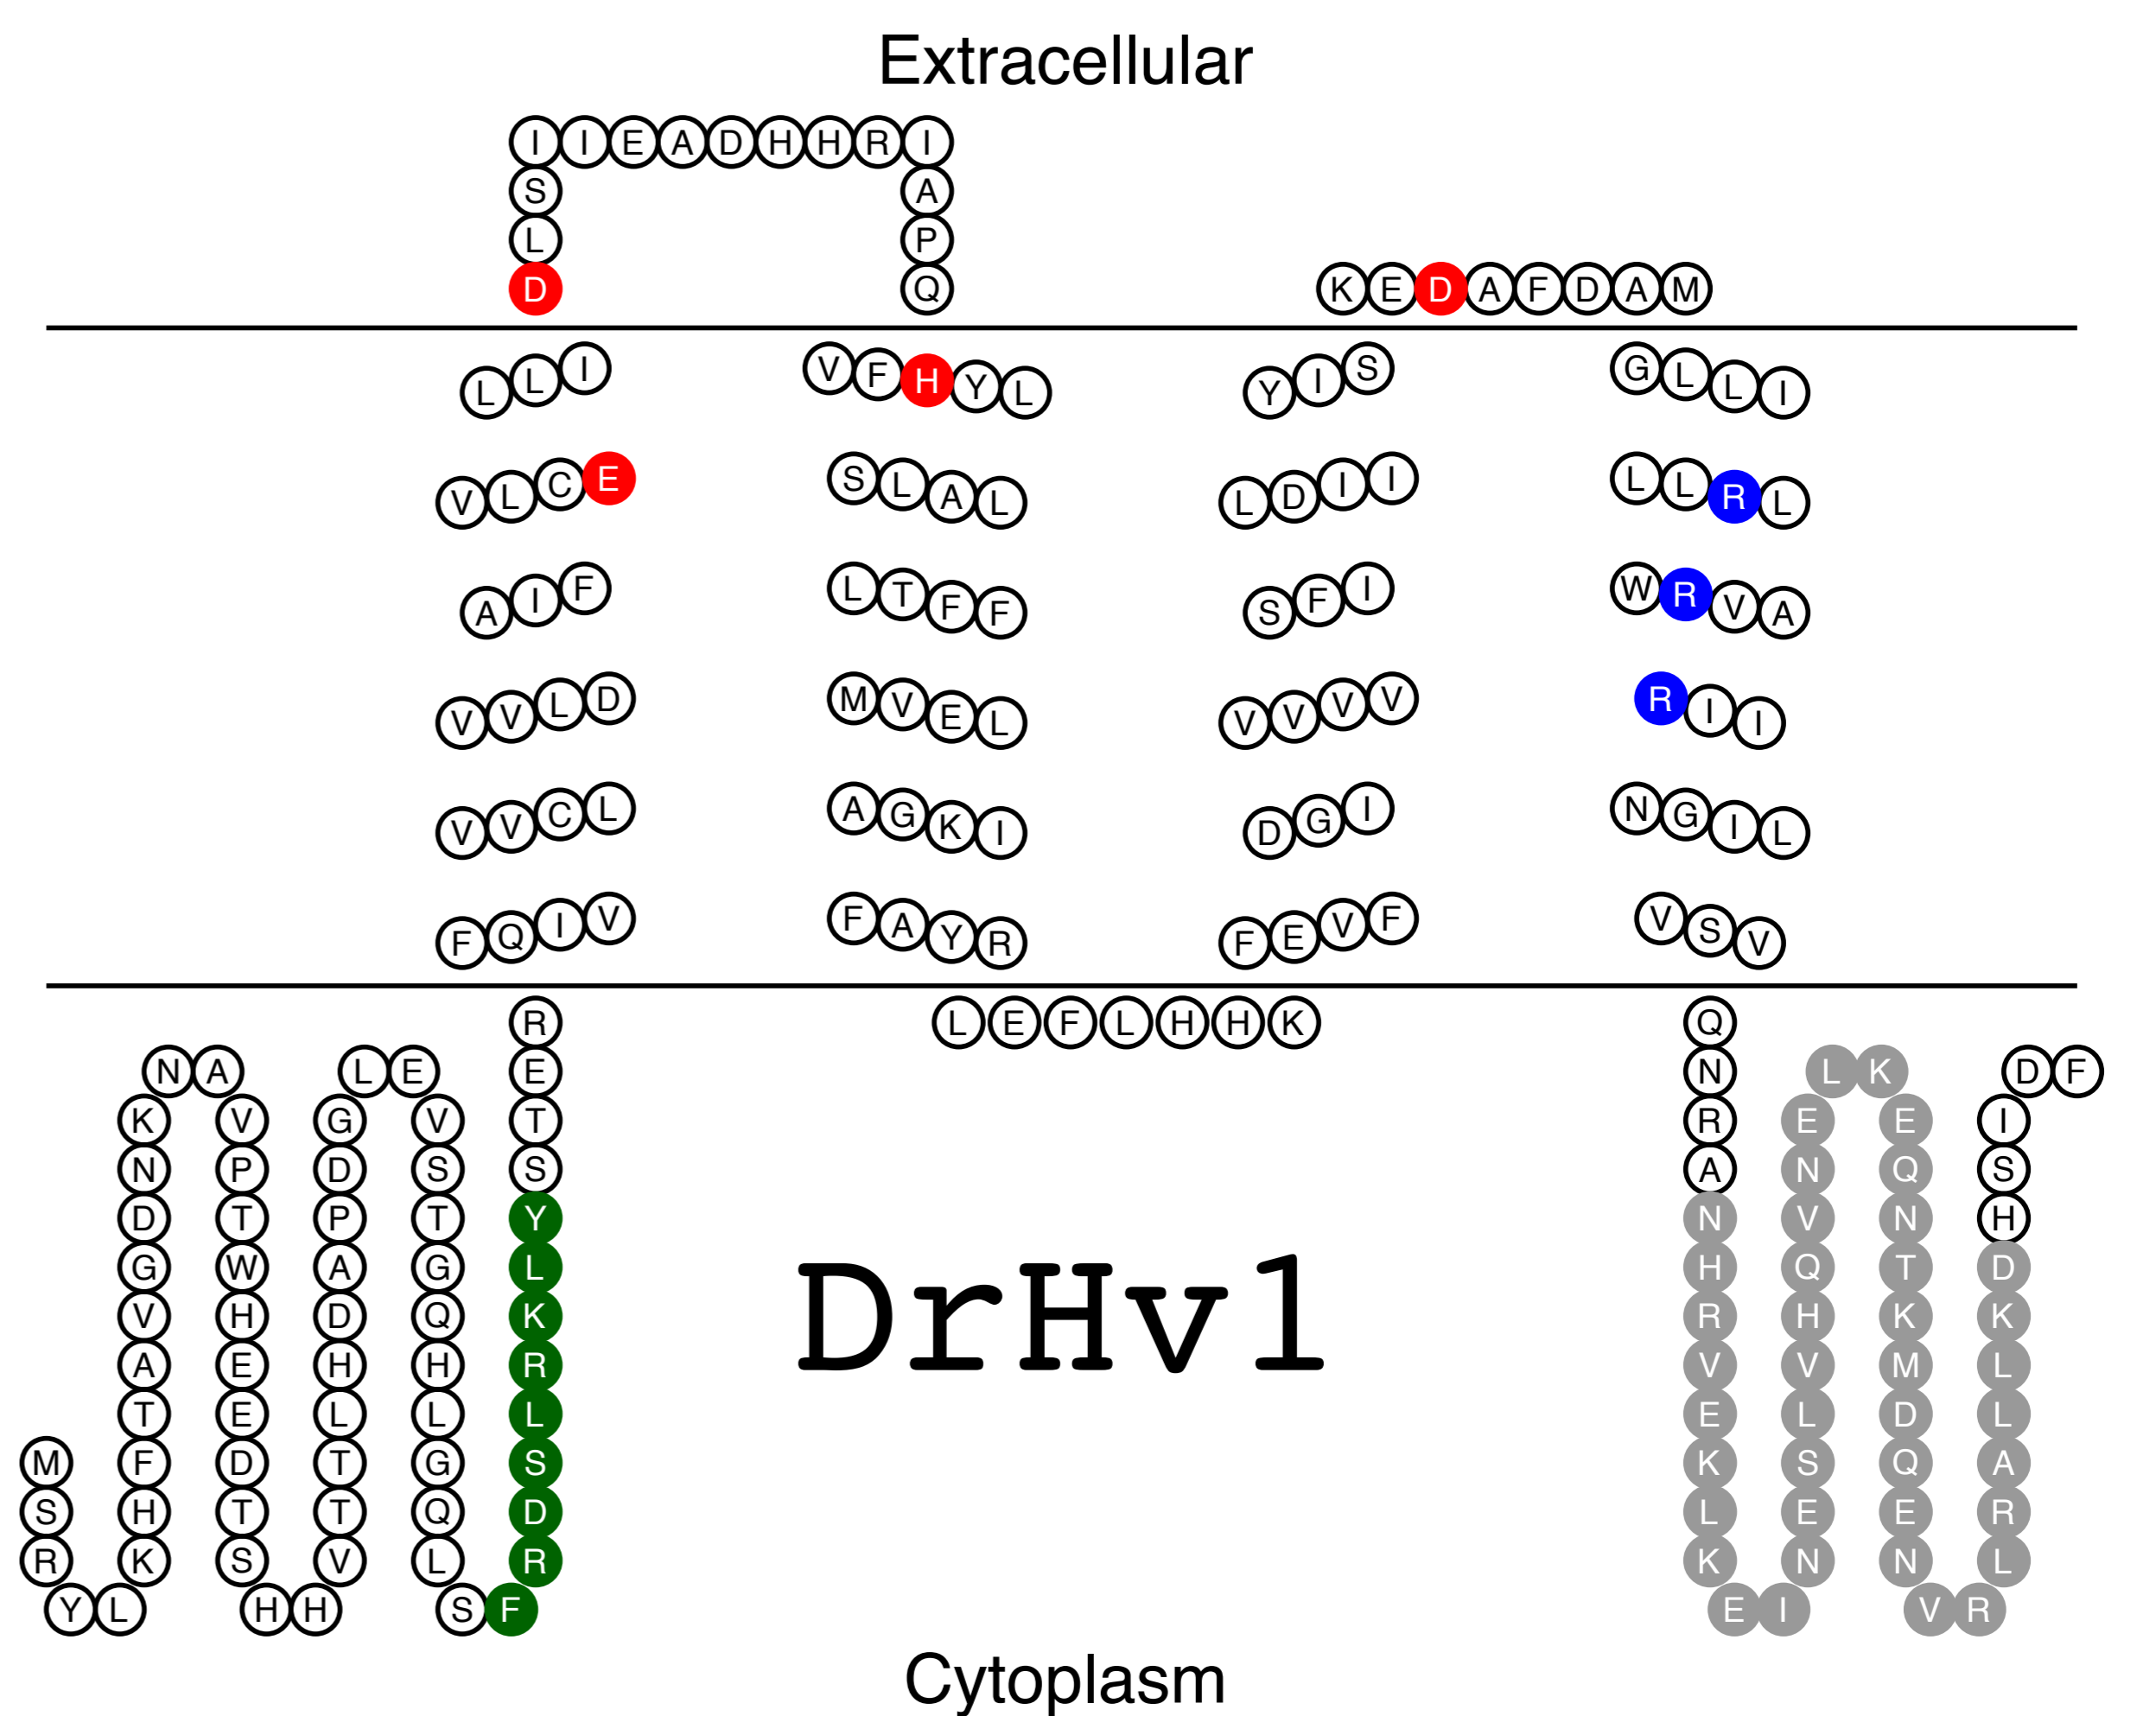

**Histidine-binding residue**

# Figure S2

|       |                                                                                     |    |
|-------|-------------------------------------------------------------------------------------|----|
| hHv1  | MATWDEKAVTRRAKVAPAERMSKFLRHFTVVGDDYHAWNINYKKWENEEEEEEEQ-PPPTPVS GEEGRAAAPDVAPAPG    | 79 |
| mHv1  | MTSHDPKAVTRRTKVAPT KRMSRFLKHFTVVGDDYHTWNVNYKKWENEEEEEE-----PAP TSAEGE-GNAEGPDAEAGSA | 75 |
| XlHv1 | -----MAGCLRHFSTVGD DTK-----KREWKQED-----VEVAYEEPLKNT P                              | 37 |
| OlHv1 | -----MSRYLKHFTVGD KH-----HTVWEDEE-----LHAVSED-LSPAS                                 | 35 |
| TnHv1 | -----MSRYLRFVTTVGD DQ-----PAQWDEEE-----LHVNSEE-LSSAT                                | 35 |
| OnHv1 | -----MSRYLKHFTA VGDQH-----VVHSDEEE-----LHVSSEE-LSSAT                                | 35 |
| DrHv1 | -----MSRYLKHFTA VGDNKNA-----VPTWHEEDTSHH-----VTTLHDAPDG-LEVST                       | 44 |
| IpHv1 | -----MVRFLRFFTVVG DDDHQA-----ASRWHEED-----LHKVSED-LEAAK                             | 37 |

|       |          |            |                                |                                         |     |
|-------|----------|------------|--------------------------------|-----------------------------------------|-----|
|       | S0       | S1         | S2                             |                                         |     |
| hHv1  | PAPRAPLD | FRGMLRKLFS | SSHRFQVIIICLVVLDALLVLAELIID    | DLKIIQPDKNNYAAMVFHYMSITILVFFMMEIIFKLF   | 159 |
| mHv1  | STPRQSLD | FRSRLRKLFS | SSHRFQVIIICLVVLDALLVLAELLLD    | DLKIIIEPDEQDYAVTAFHYMSFAILVFFMLEIFFKIF  | 155 |
| XlHv1 | HPFIASYS | FRGALKWLL  | SSHKFQIVIIICLVILDALFVLVEVLLD   | LELLAEKVDHIPEIFHYLSISVLTFFILEIAGKLY     | 117 |
| OlHv1 | GLFPTSLS | FRALKRLYV  | SERFQVAVVCLVILDACFVLAELIID     | DLSVIKLDHGHIAPFVHYLSLAVLTFMMELAGKLF     | 115 |
| TnHv1 | GQYPTTLT | VRERLQMYC  | SERFQILVVCLVILD AIFVLVELLD     | DLSIIKLDHG SVAPEVHFHLSLGLVFFLLELAGKLF   | 115 |
| OnHv1 | GQLPATLT | FRDSFKRLY  | SSERFQVLVVCLVILD AIFVLAELIID   | DLAVIKLEHGHIAPFVHYLSLAILTFFMLELAGKLF    | 115 |
| DrHv1 | GQHLGQLS | FRDSLRLKLY | STERFQIVVVCLV VLD AIFVLC ELLID | DLSII EADHHRIAPQVHFHYLSLALLTFFMVELAGKIF | 124 |
| IpHv1 | PPAT-QLT | FRDGLKNLF  | SSQR FQIAVVCLVIMDALFVLC ELLID  | DLSII EVDEHHIAPQVHFHYLSLALLTFFIVELAFKLY | 116 |

|       |            |                         |                    |                         |                      |     |
|-------|------------|-------------------------|--------------------|-------------------------|----------------------|-----|
|       | S3         | S4                      | Coiled-coil domain |                         |                      |     |
| hHv1  | VFRLEFFHHK | FEILD AVVVVS FILDIVLLF  | QEHQFEAL           | GLLILLRLWRVARIINGIISV   | KTRSERQLLRLKQMNVQLA  | 239 |
| mHv1  | VFRLEFFHHK | FEILDAFVVVVS FVLDLVLLF  | KSHHFEAL           | GLLILLRLWRVARIINGIISV   | KTRSERQILRLKQINIQLA  | 235 |
| XlHv1 | AFRLEFFHHK | FEVFDAAIVVIS FII DIVYIS | REDIFNAV           | GLLILLRLWRVARI VNGVIVSV | KTRAE EKMKHLKEQKGSLL | 197 |
| OlHv1 | AFRLEFFHHK | FEMFDGLVVVVS FILDIVFIF  | HEDAFDGM           | GLLILLRLWRVARIINGIVVSV  | KNRADQRIHKLKESYDHVV  | 195 |
| TnHv1 | AFRKEFFDHK | FEVFDGLVVTVS FVLDVAFIF  | HEDAFDGI           | GLLILLRLWRVARIINGILVSV  | KTREQQKLHKLKESYDHLV  | 195 |
| OnHv1 | AYHLEFFLHK | FEVFDGFVVIVS FILDIVFIF  | HEDAFDGI           | GLLILLRLWRVARIINGILVSV  | KTRADQKIHKLKESYDHLV  | 195 |
| DrHv1 | AYRLEFLHHK | FEVFDGIVVVVS FILDIIYIS  | KE DAFDAM          | GLLILLRLWRVARIINGILVSV  | QNRA NHRVEKLKEINESLV | 204 |
| IpHv1 | AFRLEFFHHR | FEVFD AIVVIVS FILDIVYIS | KENAFDGM           | GLLILLRLWRVARIINGILLSV  | KSQANHRVQKLKEENDRLH  | 196 |

|       |                             |          |     |
|-------|-----------------------------|----------|-----|
|       | Coiled-coil domain          |          |     |
| hHv1  | AKIQHLEFSCSEKEQEIERLNKLLRQ  | HGLLGEVN | 273 |
| mHv1  | TKIQHLEFSCSEKEQEIERLNKLLKQ  | NGLLGDVN | 269 |
| XlHv1 | EKVAQLEQQCAQQEQEIGRLHKLLQE  | HNVFPAS- | 230 |
| OlHv1 | QRVTELQKSCDDL TQENHRLKAILKE | NQIDF--- | 226 |
| TnHv1 | QRVTELQQLTDKLEKEKQRLQALLKK  | HDIEF--- | 226 |
| OnHv1 | QRVTELQERNDKLAQENDNLKALLKK  | HGIDI--- | 226 |
| DrHv1 | HQVNELKEQNTKMDQENVRLRALLKD  | HSIDF--- | 235 |
| IpHv1 | HQIGELKEHKTAMEQEVSKLRAVLAK  | HSIQY--- | 227 |

Figure S3

**A**

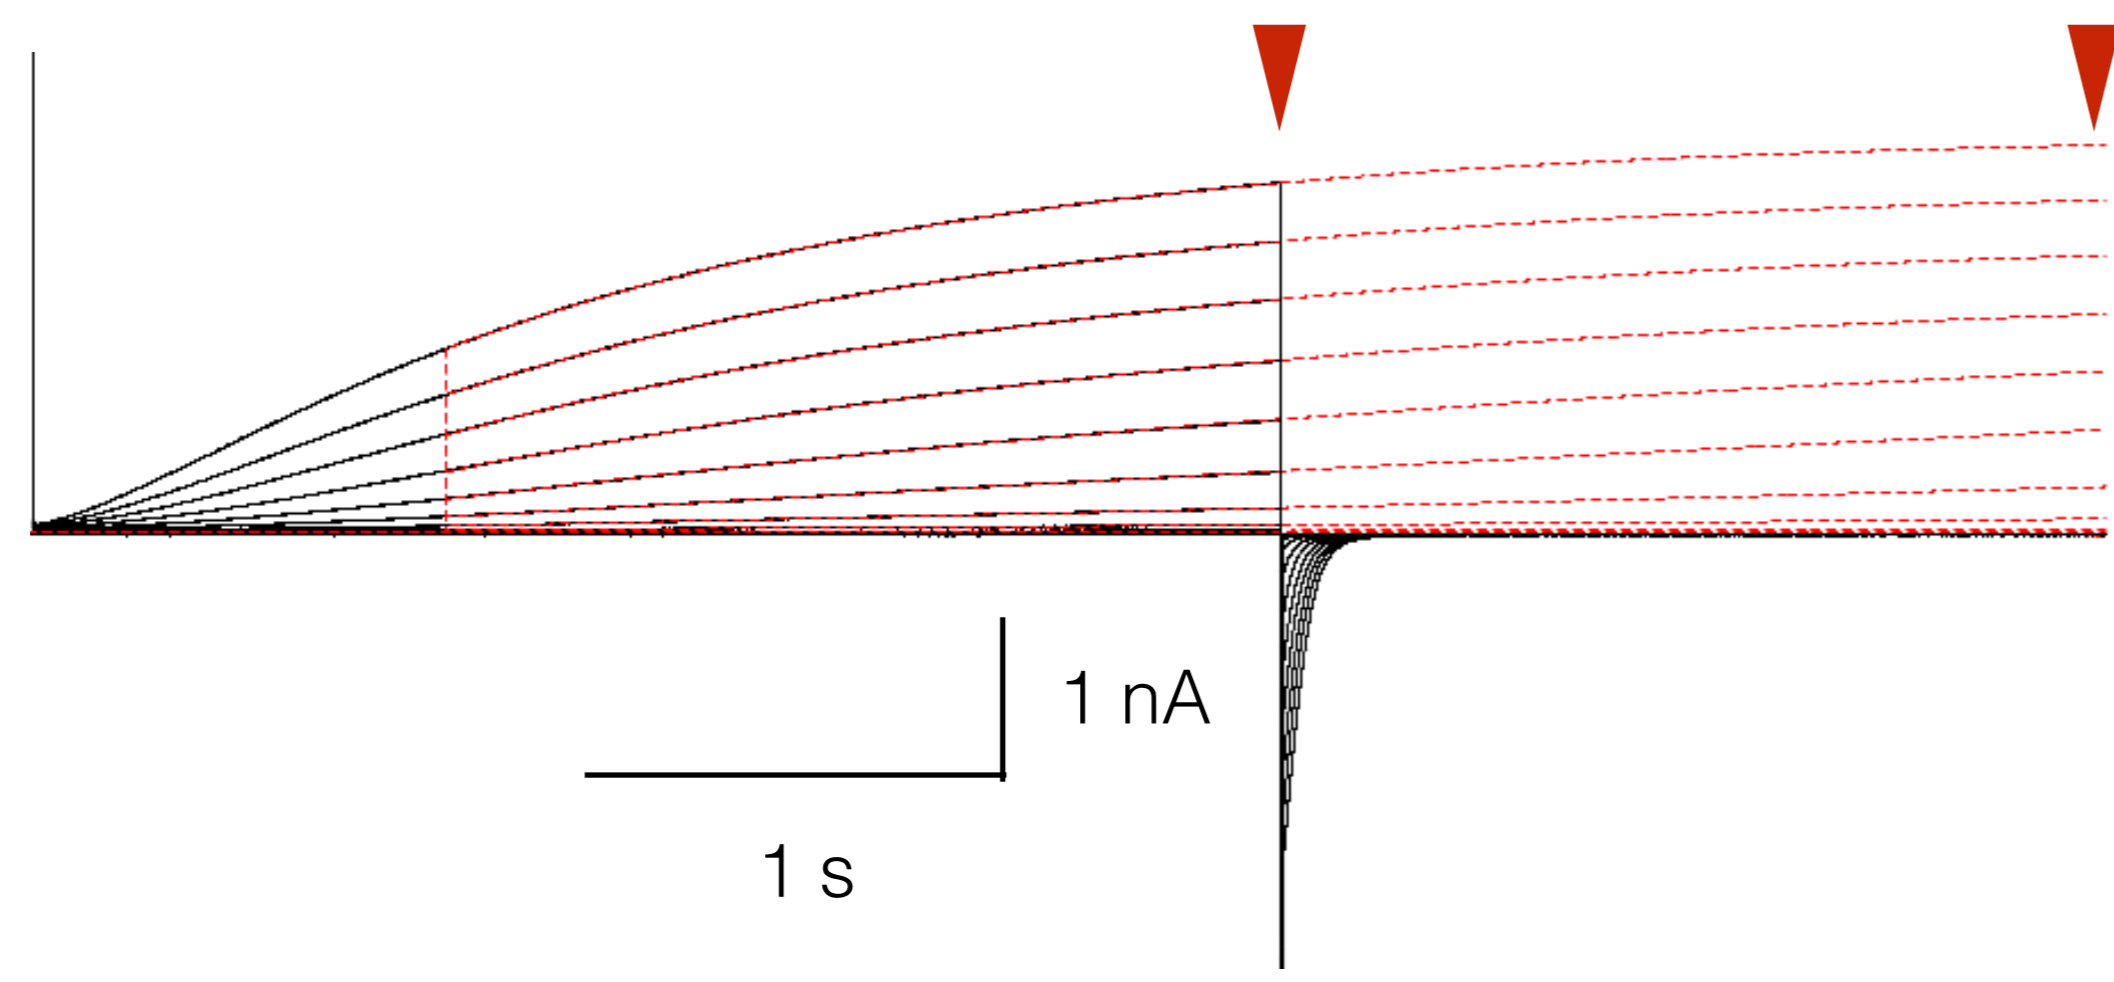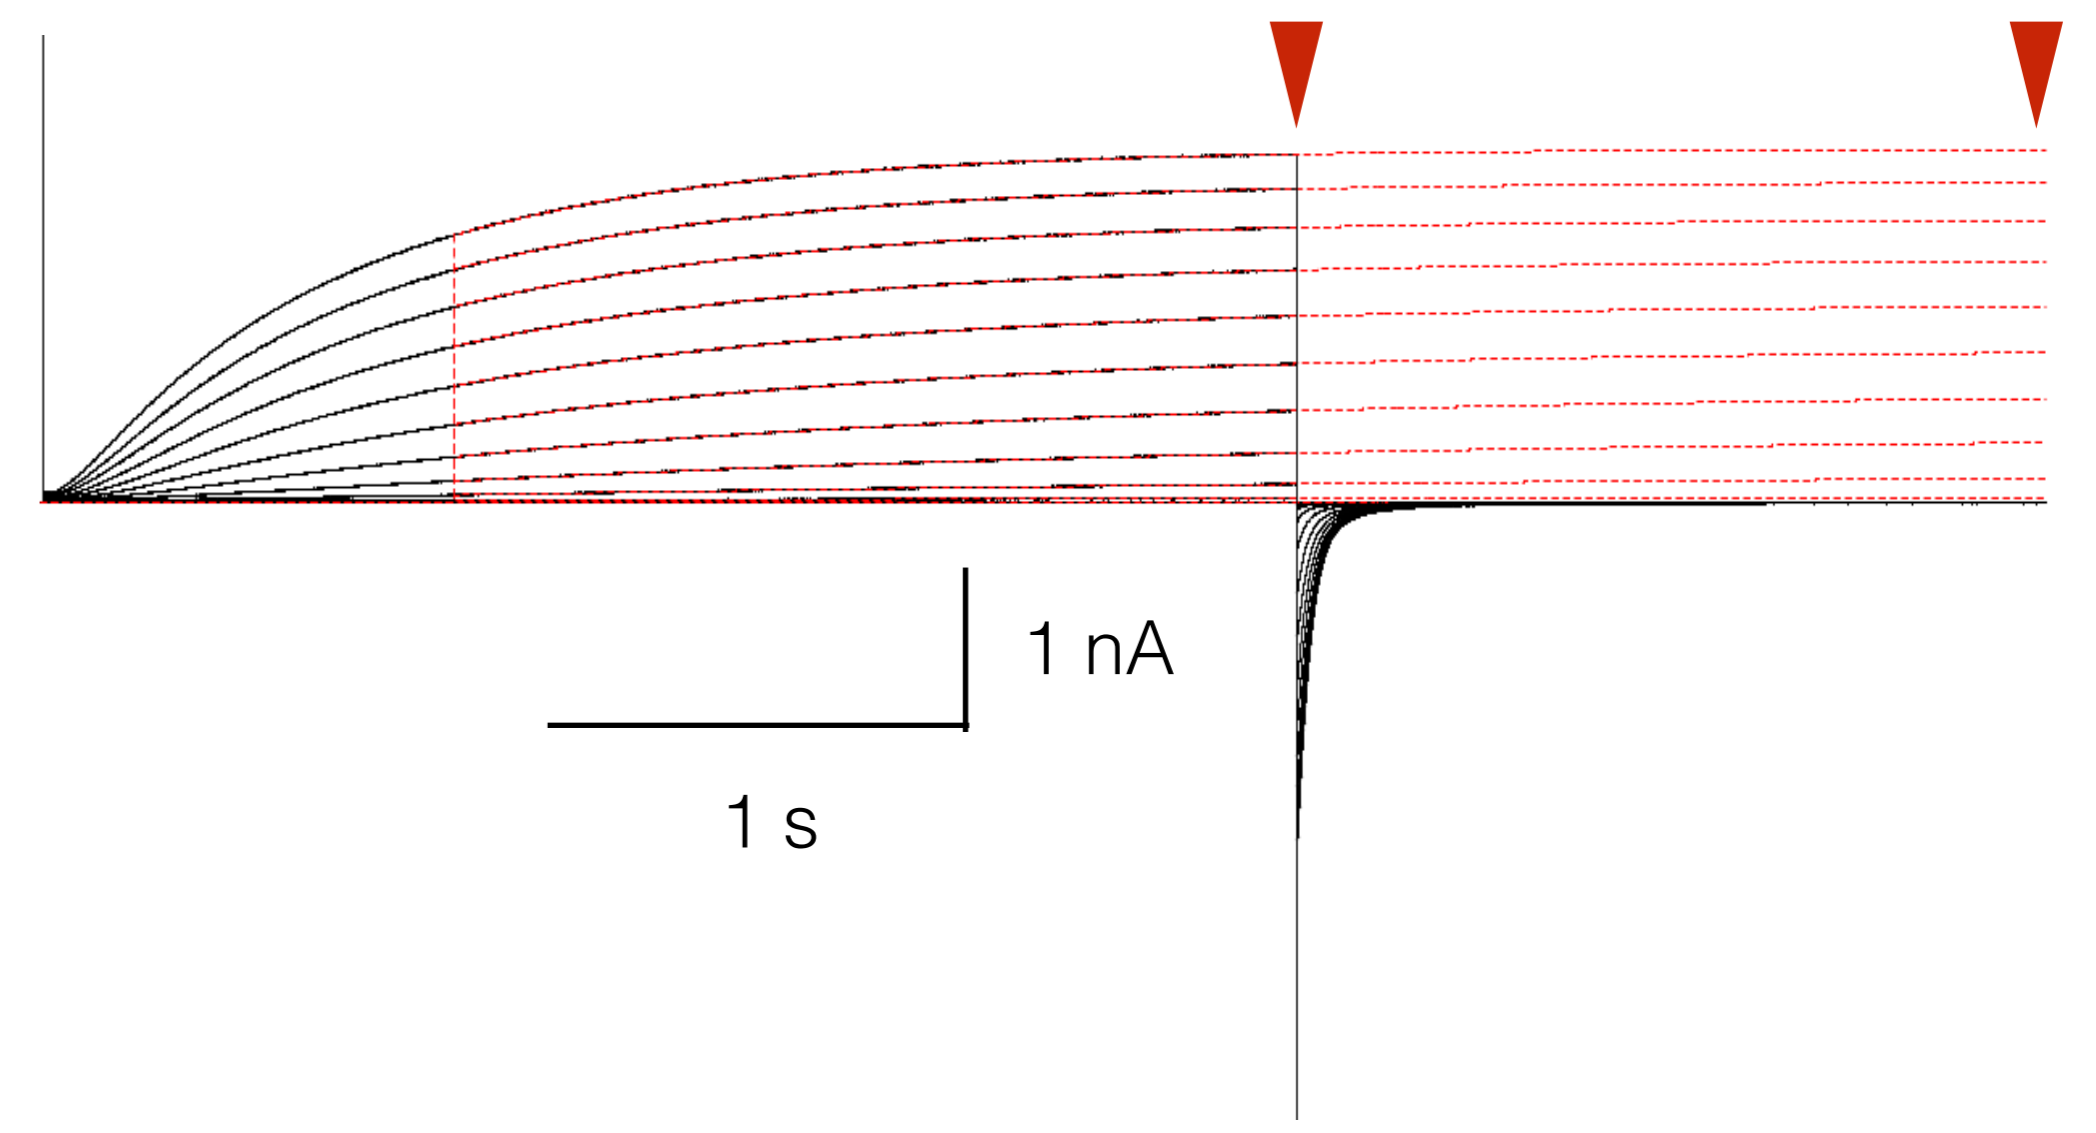

**B**

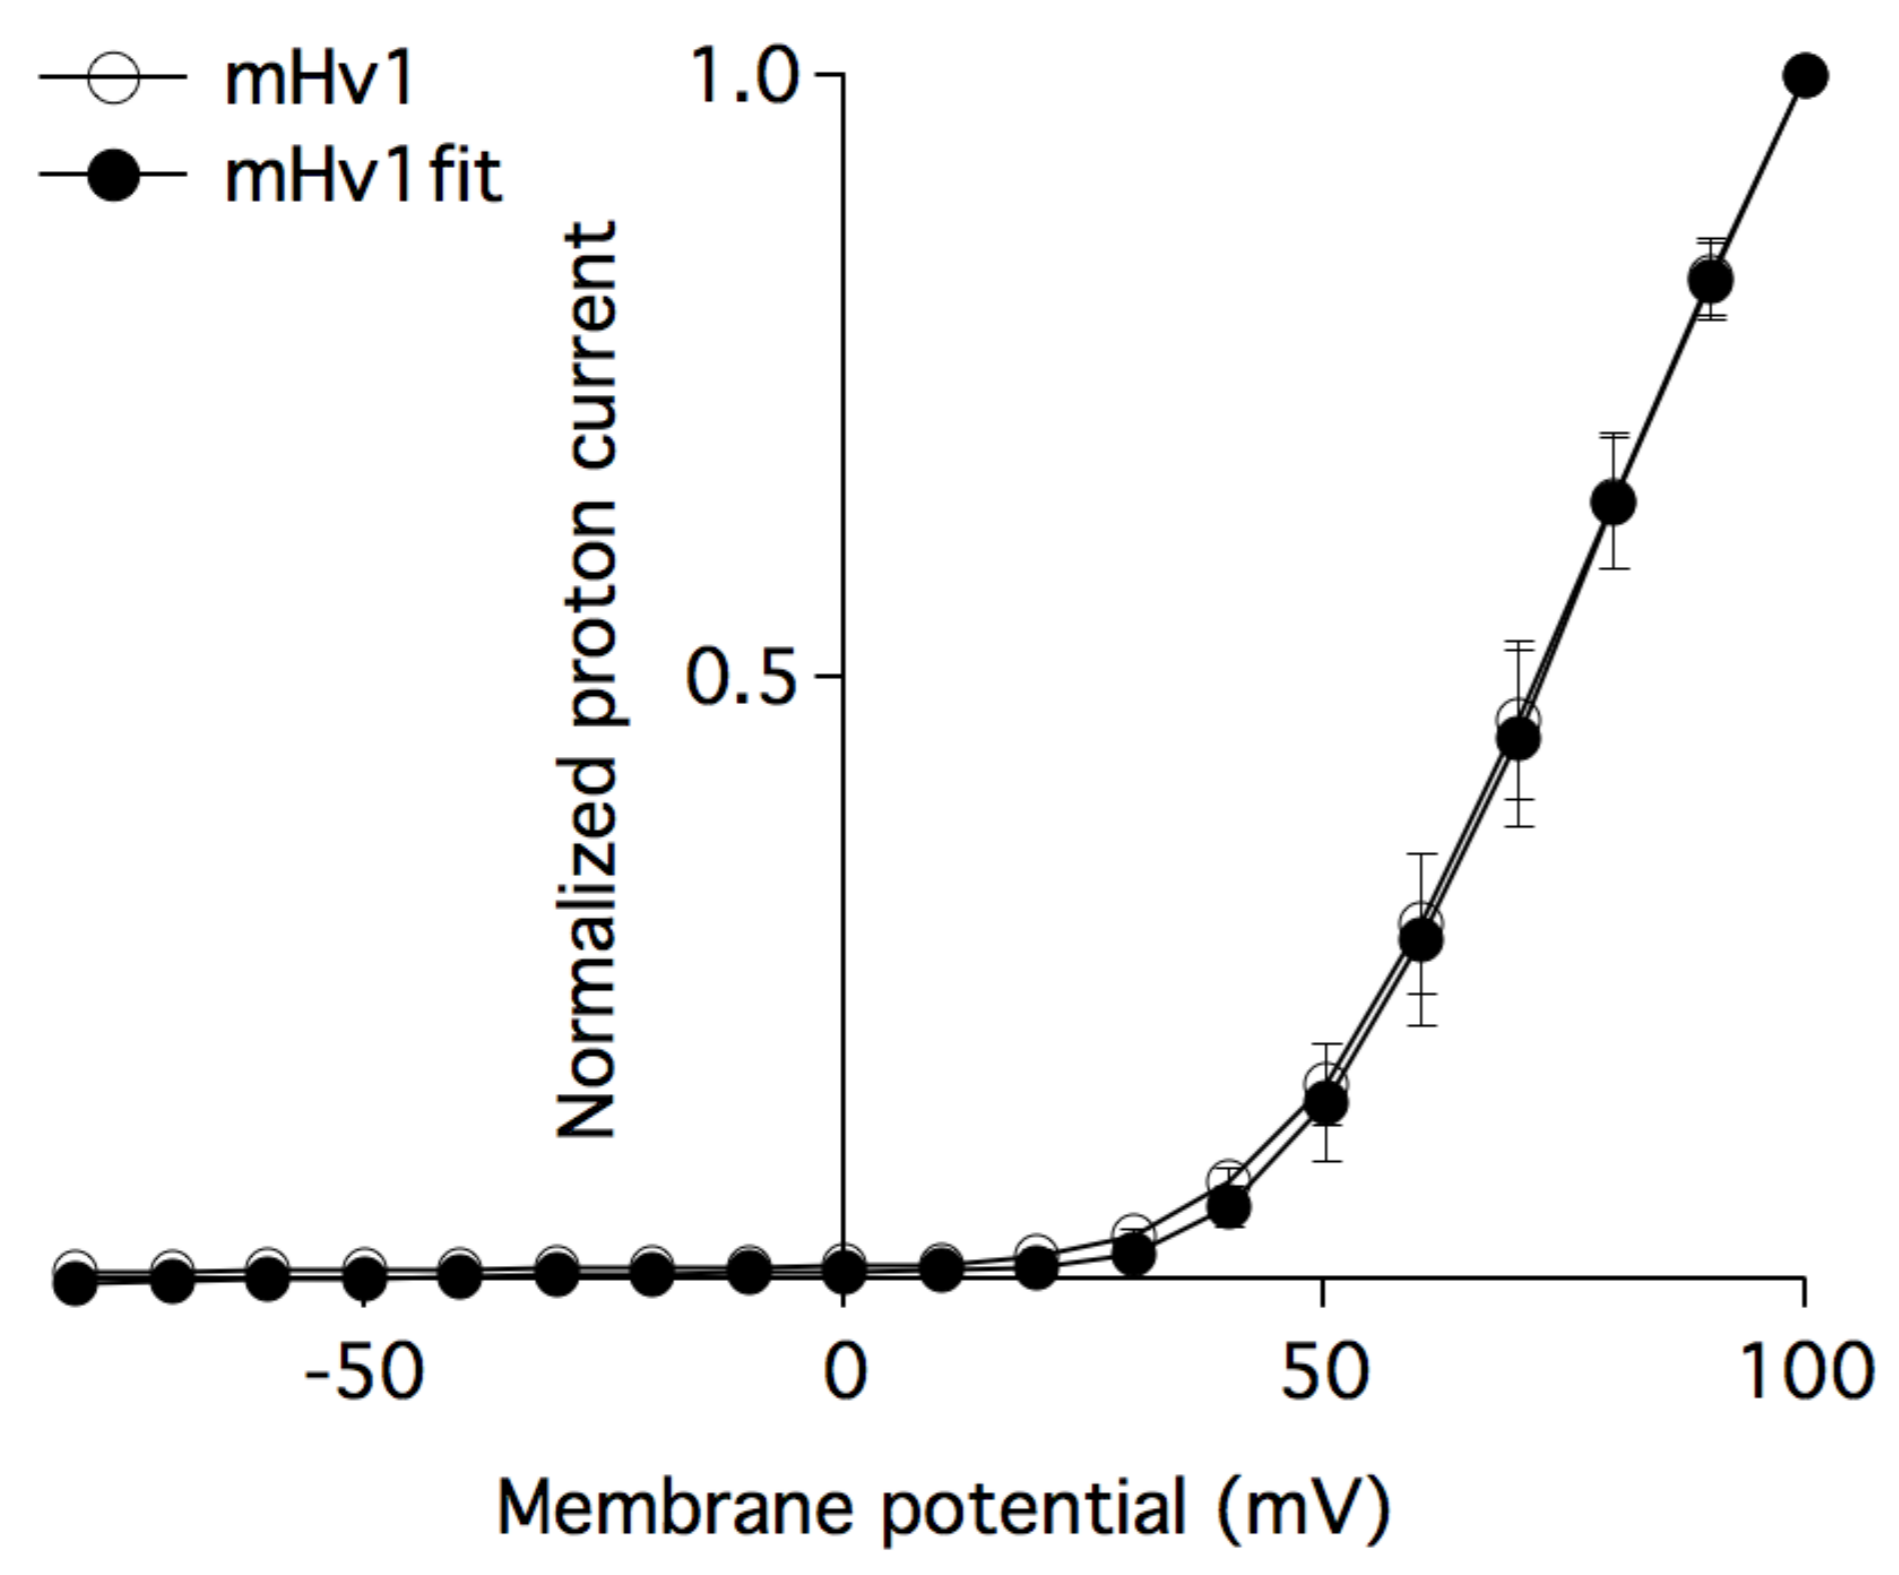

**C**

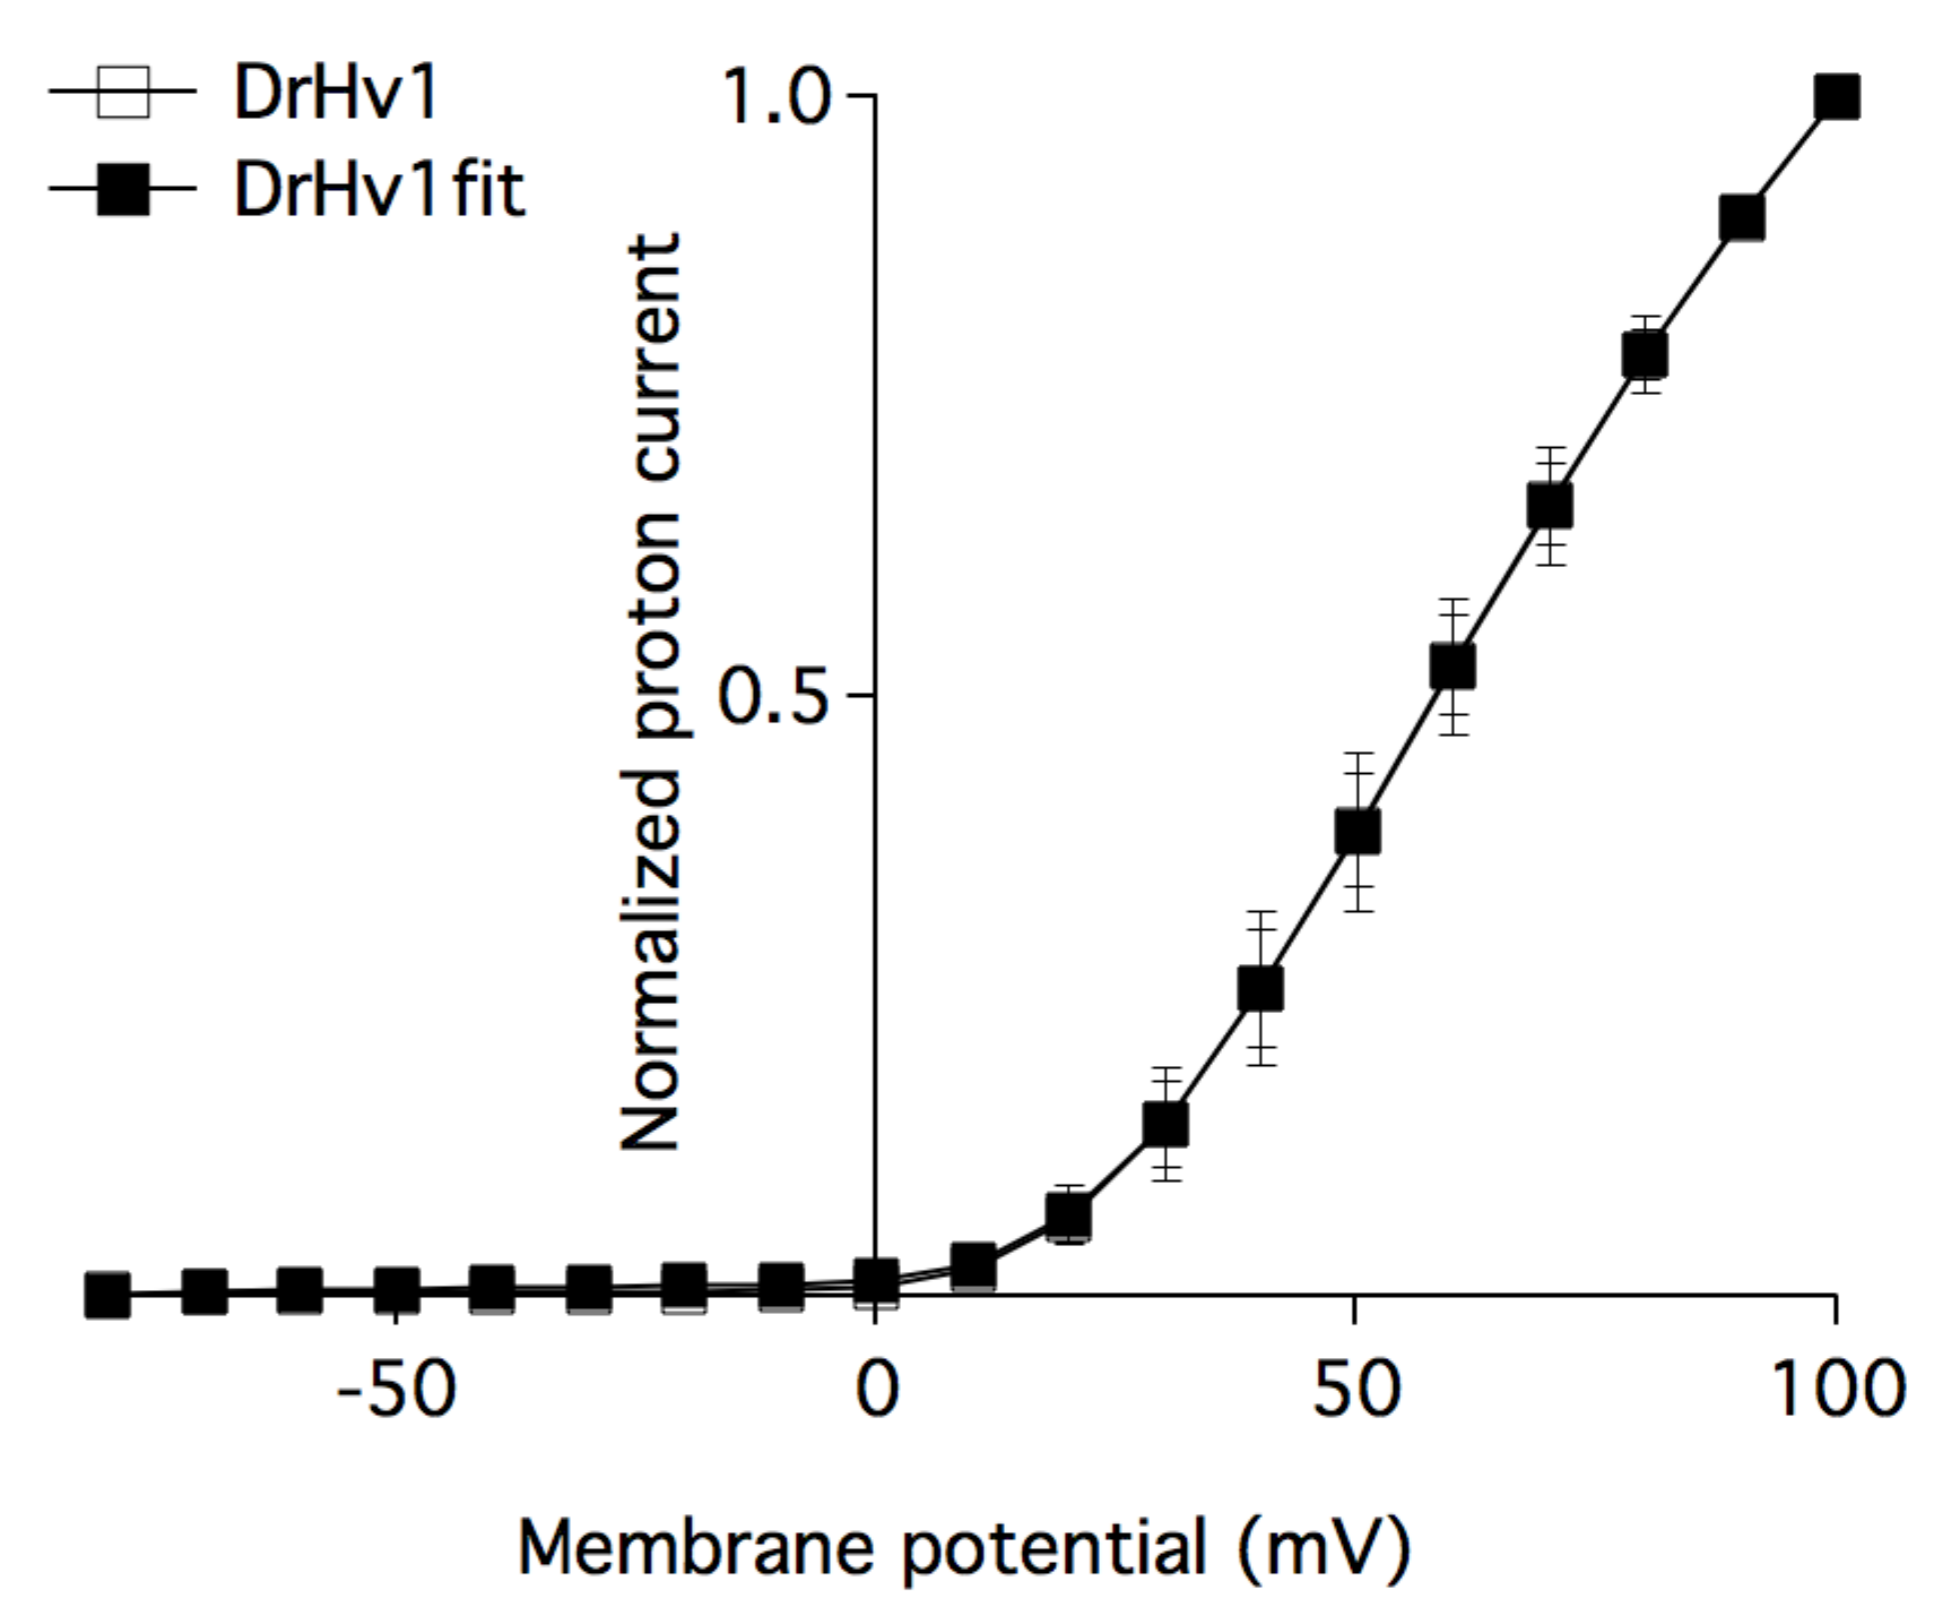

Supplement: PHY2-5-e13345-s001.pdf [file PHY2-5-e13345-s001.pdf]
